# Supplementary material for: Rapid detection of trichlorfon residues by a microfluidic paper-based phosphorus-detection chip (μPPC)
Source: Royal Society of Chemistry journal article supplement (doi:10.1039/c9nj00898e), 2019-01-01
Supplement: c9nj00898e1.pdf [file c9nj00898e1.pdf]

## Supporting Information for

### **Rapid Detection of Trichlorfon Residues by Microfluidic Paper-based Phosphorus-detection Chip ( $\mu$ PPC)**

Siwei Deng <sup>a</sup>, Tingyuan Yang <sup>a</sup>, Wenxian Zhang <sup>a</sup>, Chongbo Ren <sup>a</sup>, Jing Zhang <sup>a</sup>, Ying Zhang <sup>a</sup>, Tianyu Cui <sup>a</sup>, Wanqing Yue <sup>\*ab</sup>

<sup>a</sup> Department of Chemistry, Key Laboratory of Biomedical Functional Materials, School of Sciences, China Pharmaceutical University, Nanjing, People's Republic of China

<sup>b</sup> Key Laboratory of Drug Quality Control and Pharmacovigilance (China Pharmaceutical University), Ministry of Education, Nanjing, People's Republic of China

---

\*Authors to whom any correspondence should be addressed.

Dr. W. Yue, E-mail: [yuewq@cpu.edu.cn](mailto:yuewq@cpu.edu.cn)

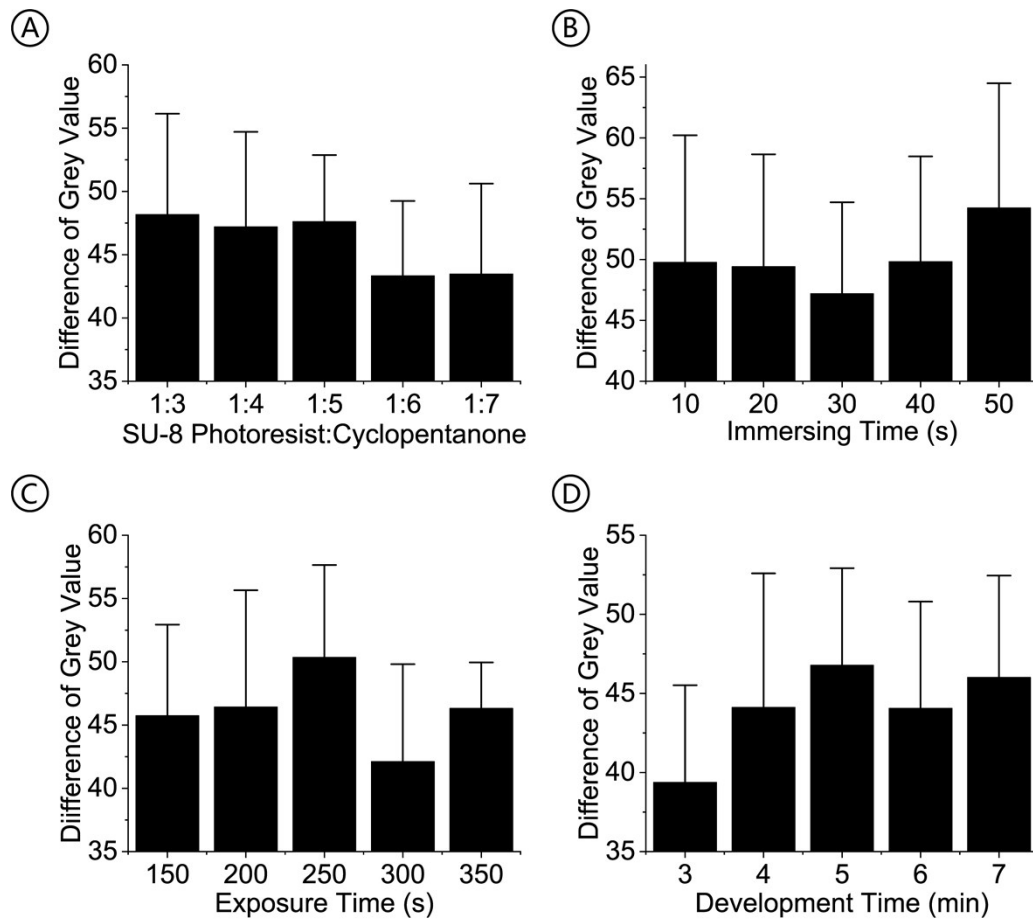

**Figure. S1** Optimization of the chip fabrication process. The difference of grey values between with and without photoresist region by varying (A) the ratio between SU-8 photoresist and cyclopentanone, (B) immersing time, (C) exposure time and (D) development time. n=6 for each conditions.
